# Supplementary material for: A review of proton exchange membranes modified with inorganic nanomaterials for fuel cells
Source: Royal Society of Chemistry journal article supplement (doi:10.1039/d4ya00446a), 2024-12-09
Supplement: d4ya00446a13.pdf [file d4ya00446a13.pdf]

Electronic Supplementary Material (ESI) for Energy Advances. This journal is © The Royal Society of Chemistry 2024

## Supplementary Materials

### **A review of proton exchange membranes modified with inorganic nanomaterials for fuel cells**

Muhammad Rehman Asghar<sup>a</sup>, Weiqi Zhang<sup>a</sup>, Huaneng Su<sup>a</sup>, Junliang Zhang<sup>c,d</sup>, Huiyuan Liu<sup>a</sup>, Lei Xing<sup>b</sup>, Xiaohui Yan<sup>c</sup>, Qian Xu<sup>a,\*</sup>

a. Institute for Energy Research, Jiangsu University, Zhenjiang 212013, China

b. Department of Chemical and Process Engineering, University of Surrey, Guildford GU2 7XH, United Kingdom

c. Institute of Fuel Cells, School of Mechanical Engineering, Shanghai Jiao Tong University, Shanghai, China

d. MOE Key Laboratory of Power & Machinery Engineering, Shanghai Jiao Tong University, Shanghai, China

\*Corresponding author. E-mail address: [xuqian@ujs.edu.cn](mailto:xuqian@ujs.edu.cn)

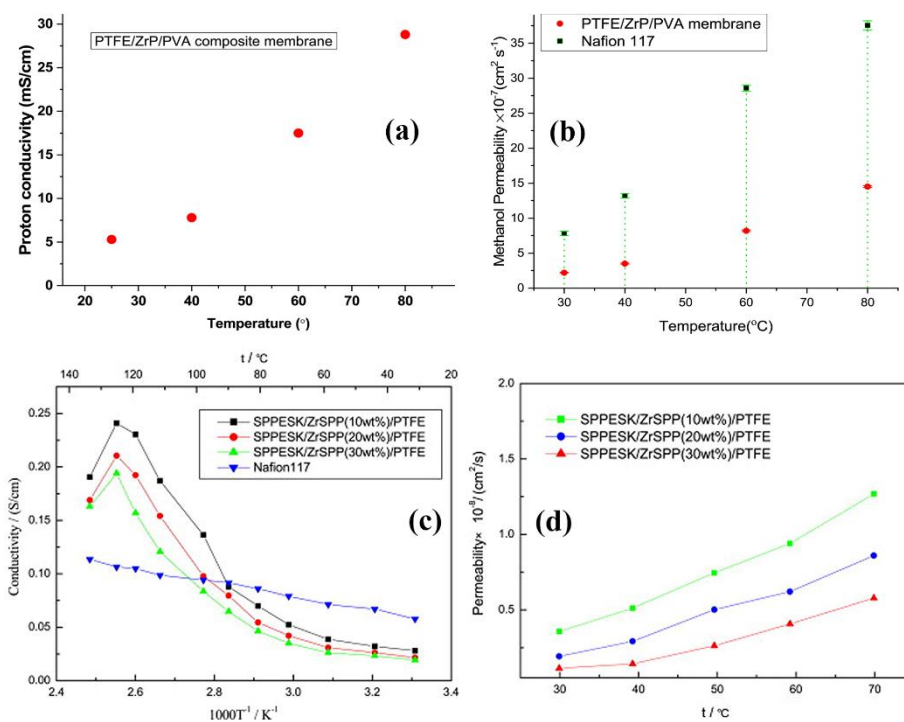

**Fig. S 1** Temperature vs. proton conductivity curves for (a) polymer blend membranes (b) polymer blend membrane and Nafion 117 membrane (c) Arrhenius plots of membranes containing SPESK, ZeSPP and PTFE (d) methanol permeability value of SPESK/ZrSPP/PTFE supported membranes <sup>12</sup>. With copyright permission 2020, 2010. Elsevier.

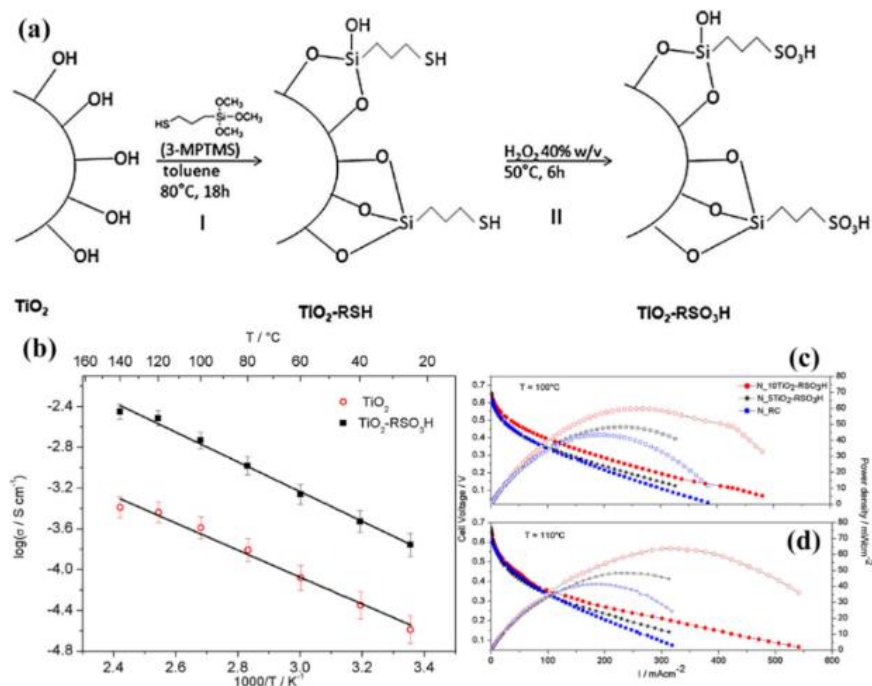

**Fig. S 2** (a) Synthesis procedure of the surface functionalization of  $\text{TiO}_2$  nanoparticles. (b) Arrhenius plots of  $\text{TiO}_2$  and  $\text{TiO}_2\text{-RSO}_3\text{H}$  based composite membranes at 100% RH. (c) Polarization as well as PD plots of recasted Nafion and titania and functionalized titania based composite membranes at  $100^\circ\text{C}$  (c) and  $110^\circ\text{C}$  (d) <sup>3</sup>. With copyright permission 2014, Elsevier.

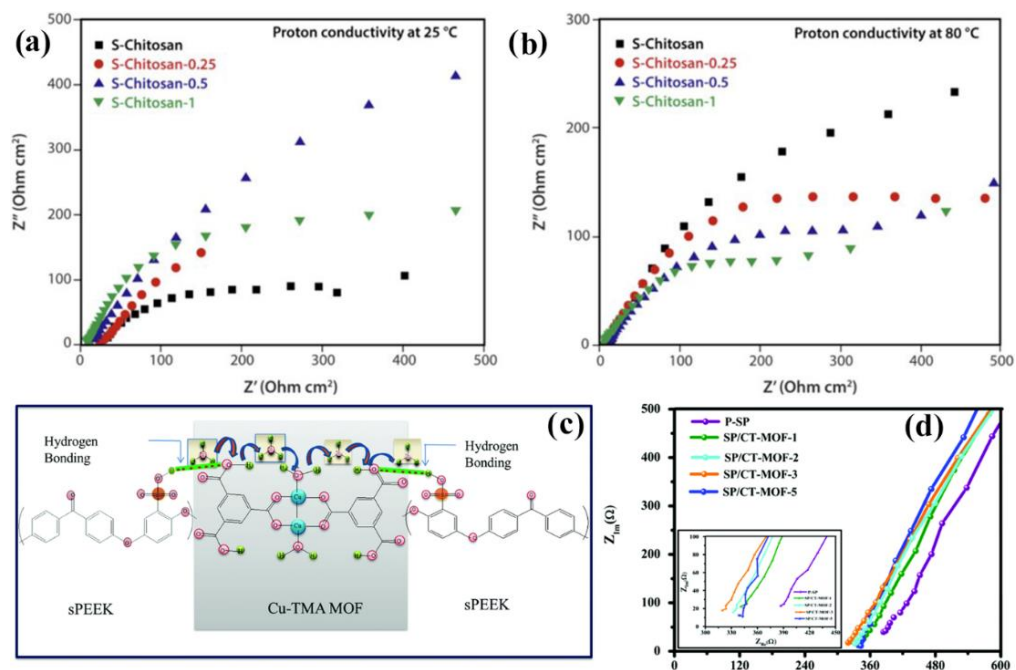

**Fig. S 3** AC impedance values of sulphonated Chitosan and blended Sulphonated chitosan and HKUST-1 hybrid membranes at the temperature of (a) 25°C and (b) 80°C. (c) Explanation of proton transfer mechanism through copper and trimesic based MOF embedded composite membrane. (d) AC impedance plot of pristine SPEEK and SPEEK/MOF composite membranes with different amounts of MOF temperature of 70 °C and RH 98 %<sup>45</sup>. With copyright permission 2018, 2022, John Wiley and Sons and Royal Society of Chemistry.

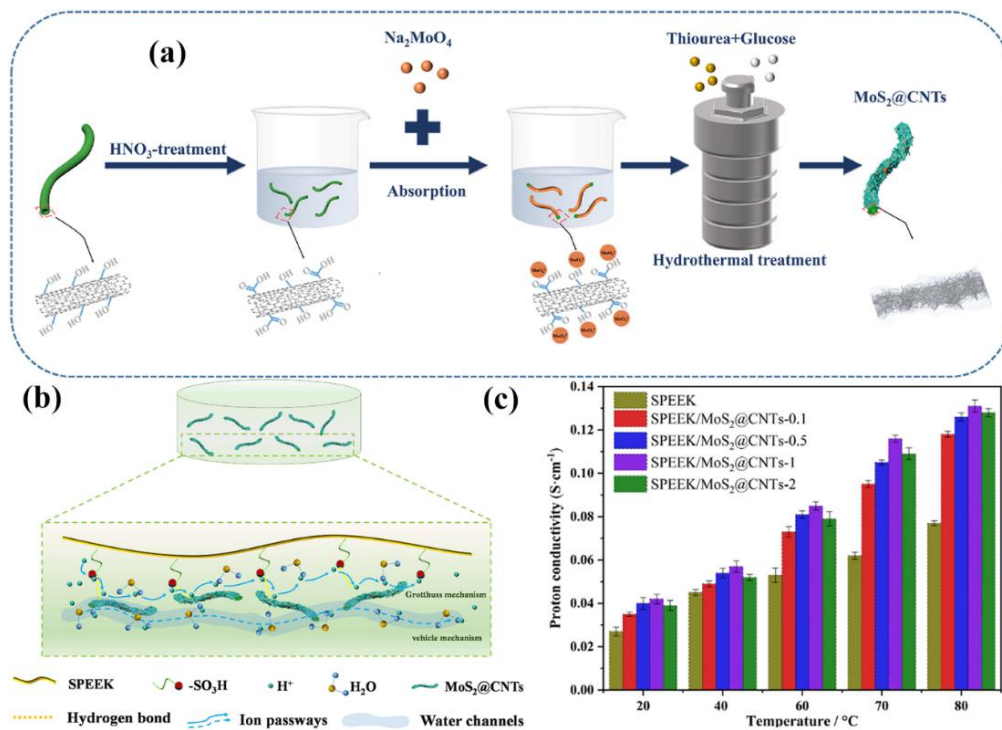

**Fig. S 4** (a) Schematic illustration of synthesis procedure of MoS<sub>2</sub> based CNTs. (b) Schematic Explanation of proton transfer mechanism within MoS<sub>2</sub>@CNTs based SPEEK membranes. (c) Temperature Vs Proton Conductivity values of pristine SPEEK and composite membranes containing different amounts of MoS<sub>2</sub>@CNT<sup>6</sup>. With copyright permission 2022, Elsevier.

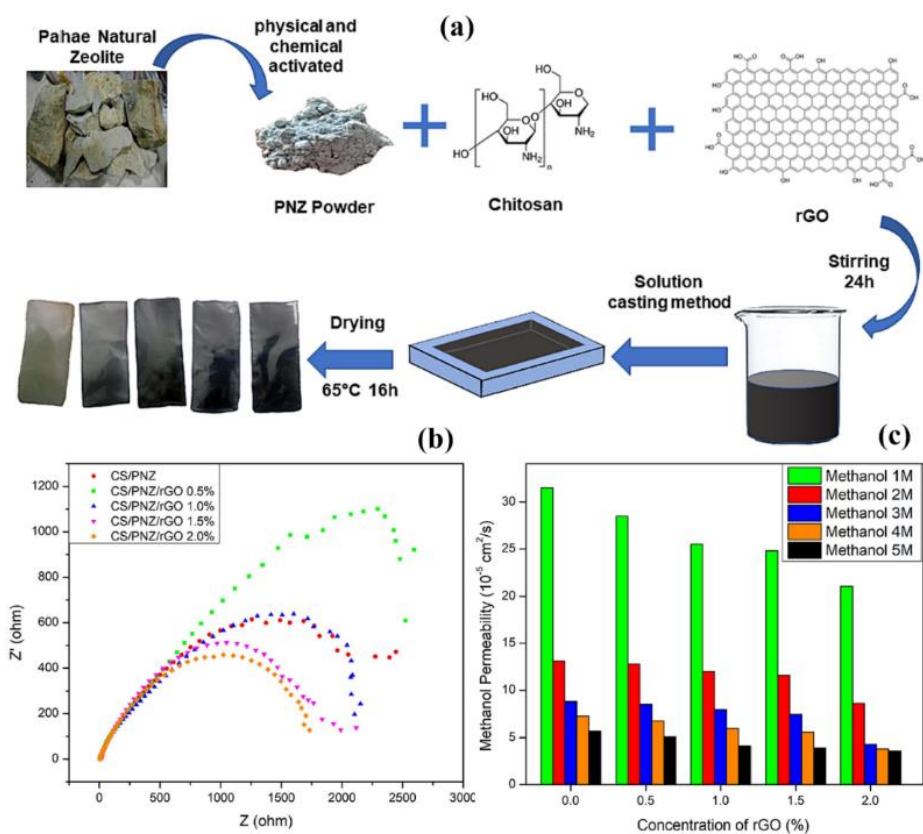

**Fig. S 5** Schematic illustrations of CS/PNZ/rGO composite membrane manufacturing procedure. (b) AC impedance curves of composite membranes with different amounts of reduced graphene oxide. (c) different concentrations of reduced graphene oxides in the composite membranes Vs methanol permeability values<sup>7</sup>. With copyright permission 2023, Elsevier.

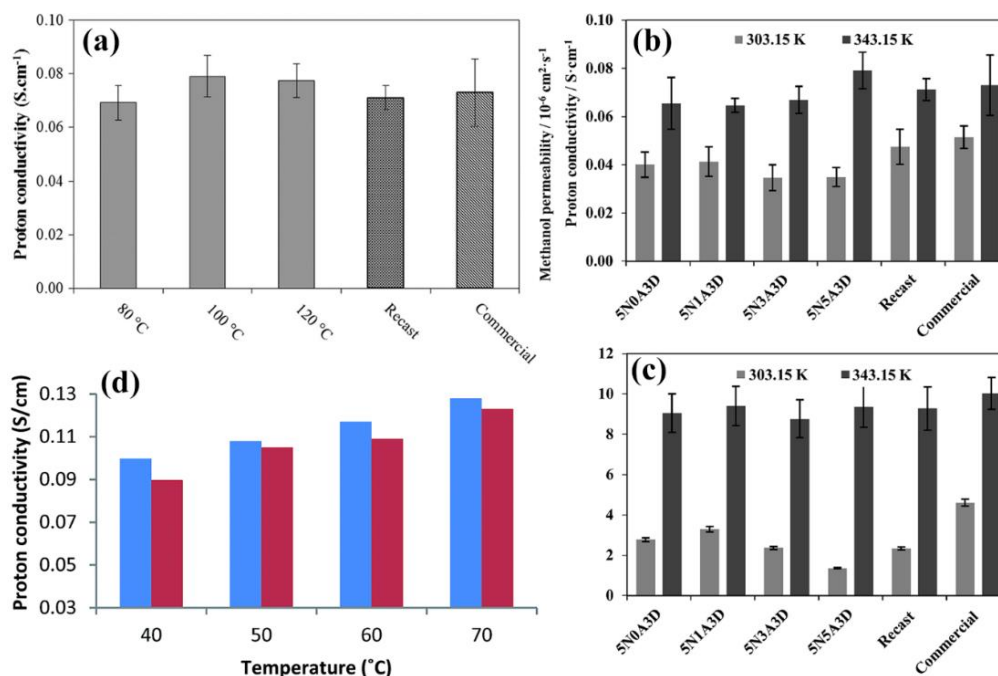

**Fig. S 6** (a) Proton conductivity values [70 °C] of commercial, 0 wt.% and 5 wt. % GMPT functionalized Mordenite and 0wt.% GMPT functionalized Mordenite composite membranes at casting temperature of 80, 100 and 120 °C. (b) Proton Conductivity and (c) Methanol permeability of Nafion/Mordenite composite membranes checked at 303.15 K and 343.15 K temperatures. (d) Temperature Vs Proton Conductivity Values of ■ Nafion 117, ■ 0.5% Mordenite loaded Nafion membrane <sup>8910</sup>. With copyright permission 2015, 2016 and 2020, Elsevier and Royal Society of Chemistry.

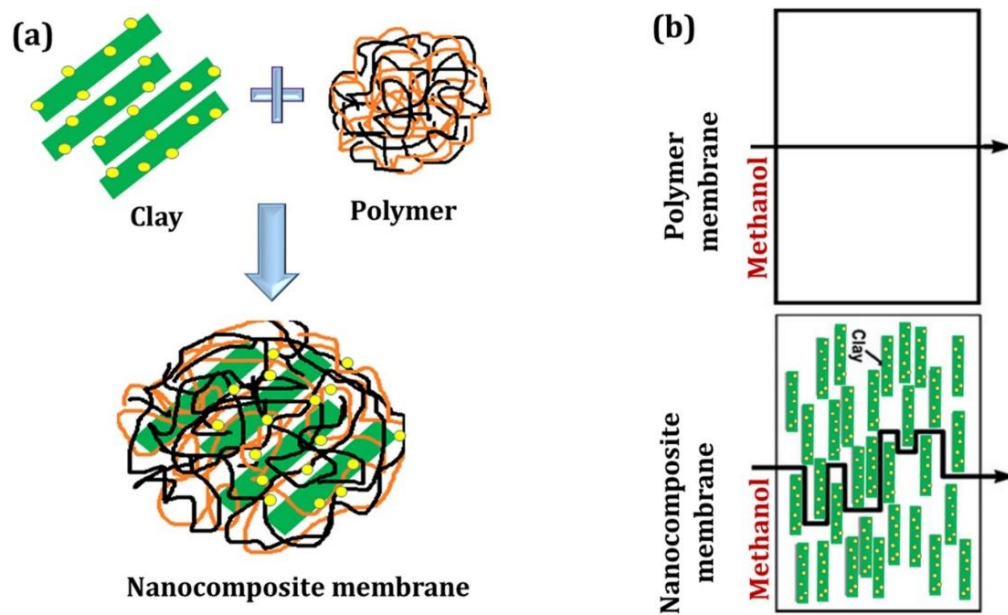

**Fig. S 7** (a) Procedure of preparation of Nanocomposite membrane [Clay + Polymer] (b) illustration of ionic channel ways developed by incorporation of exfoliated clay nano-platelets within polymer matrix<sup>11</sup>. With copyright permission 2022, Elsevier.



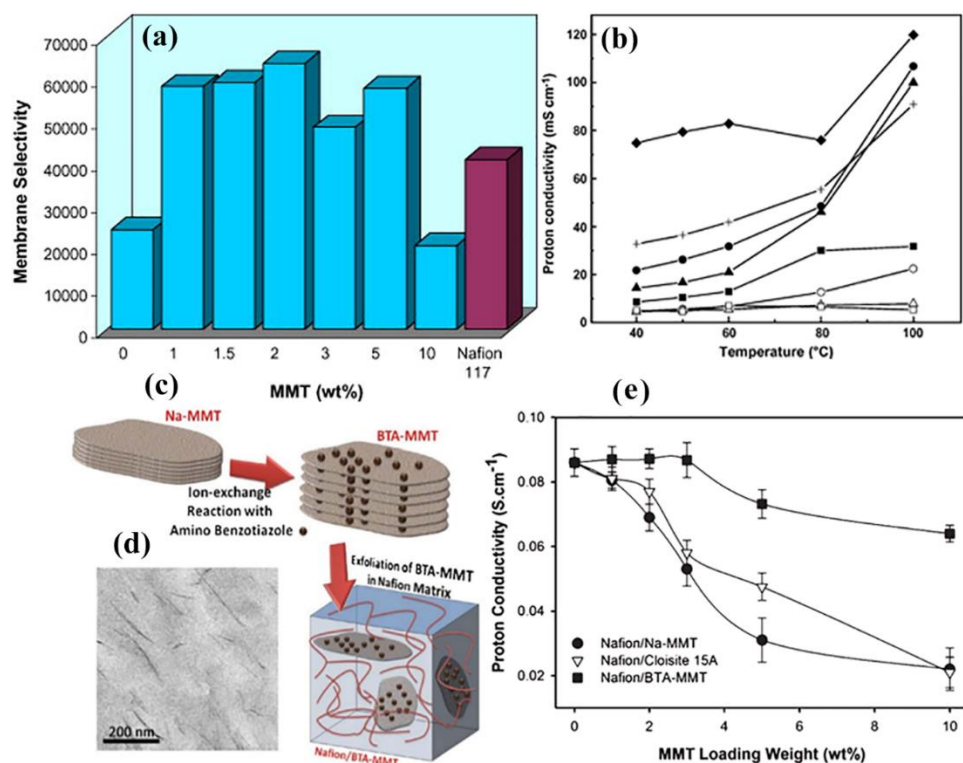

**Fig. S 8** (a) MMT weight percentage Vs membrane selectivity Curves of pristine Nafion 117 and different amounts of MMT in sulphonated PPO. (b) Temperature Vs Proton conductivity Values of SPEEK (+), Nafion® 117 (◆), and the SPEEK/SMMT composite membranes. With Amount of MMT (Empty symbols) for 1 wt. % (●), 3 wt.% (▲) and 5 wt.% (■). (c) Schematic diagram of BTA-MMT preparation with BTA molecules (d). TEM image of Nafion and BTA-MMT blended nano-composite membranes (e) MMT weight Vs Proton conductivity values of different types of Nafion membrane with NA-MMT, Cloisite 15A and BTA-MMT<sup>1213</sup>. With copyright permission 2008 and 2014, Elsevier and Royal Society of Chemistry.

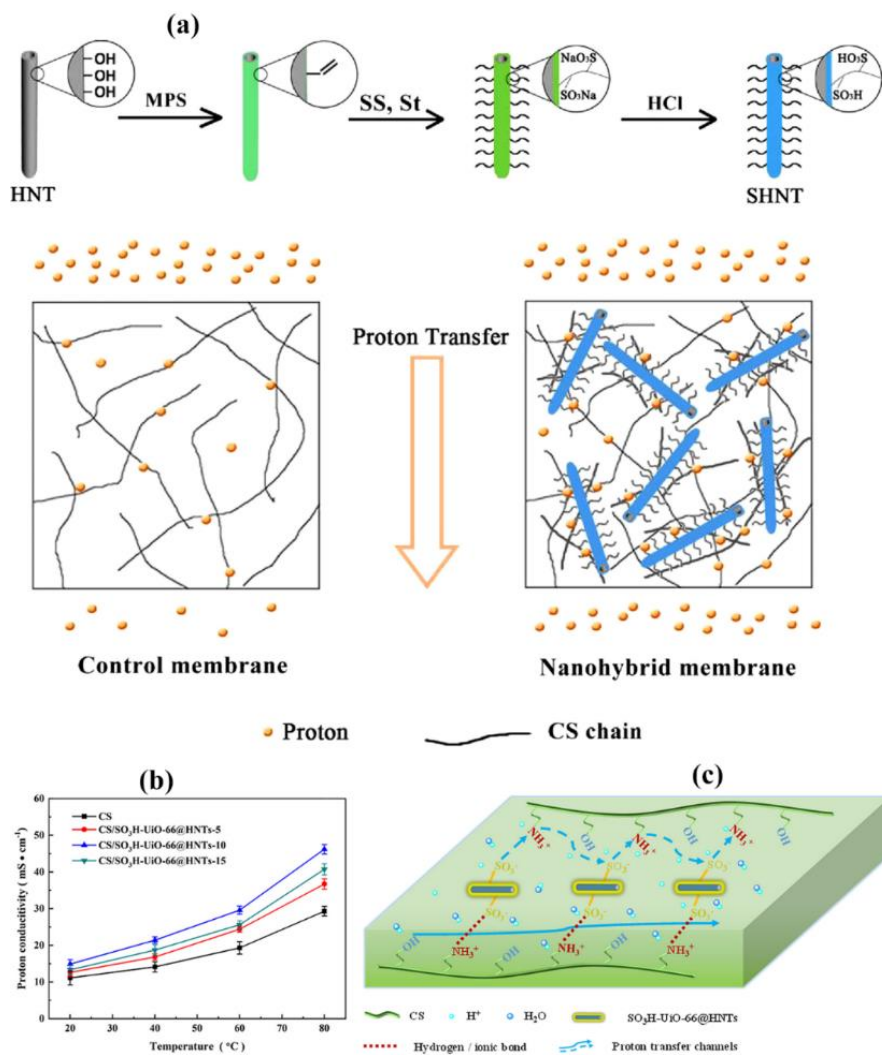

Fig. S 9 (a) Schematic diagram of synthesis of sulfonated HNT and sulphonated HNT based chitosan nano hybrid membranes. (b) Temperature Vs Proton conductivity values of Pristine chitosan membrane and 5-15 w.% sulfonated UiO-66@HNT based chitosan membranes (c) Schematic explanation of possible protons transport channels and interactions within the composite membrane<sup>1415</sup>. With copyright permission 2014 and 2021, Elsevier.

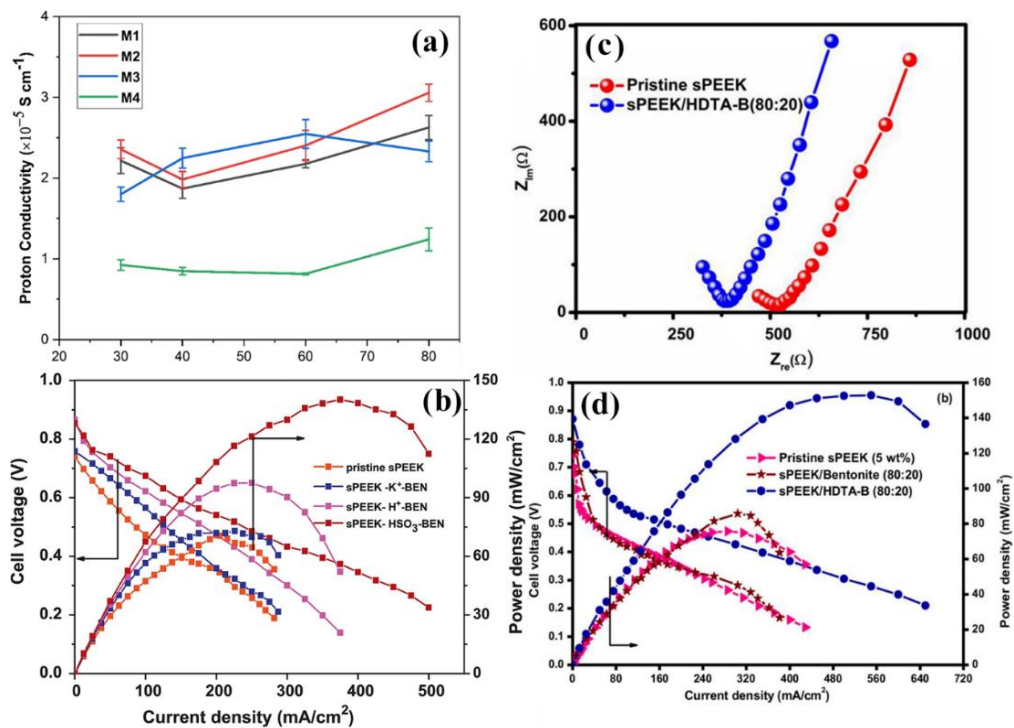

**Fig. S 10** (a) Temperature Vs Proton Conductivity values of different composite membranes containing SPEEK, Cloisite and Bentonite (b) DMFC single cell Performance with Polarization and Power density curves of pristine SPEEK, K<sup>+</sup>-BEN, H<sup>+</sup>-BEN and HSO<sub>3</sub>-BEN based SPEEK composite membranes at the temperature of 70 °C. (c) AC impedance curves and (d) RH (%) Vs Proton conductivity values curves of pristine SPEEK and HDTA based SPEEK composite membrane. [70°C under 100% RH]<sup>161718</sup>. With copyright permission 2014, 2018 and 2023, Springer, Elsevier and IOP Science.

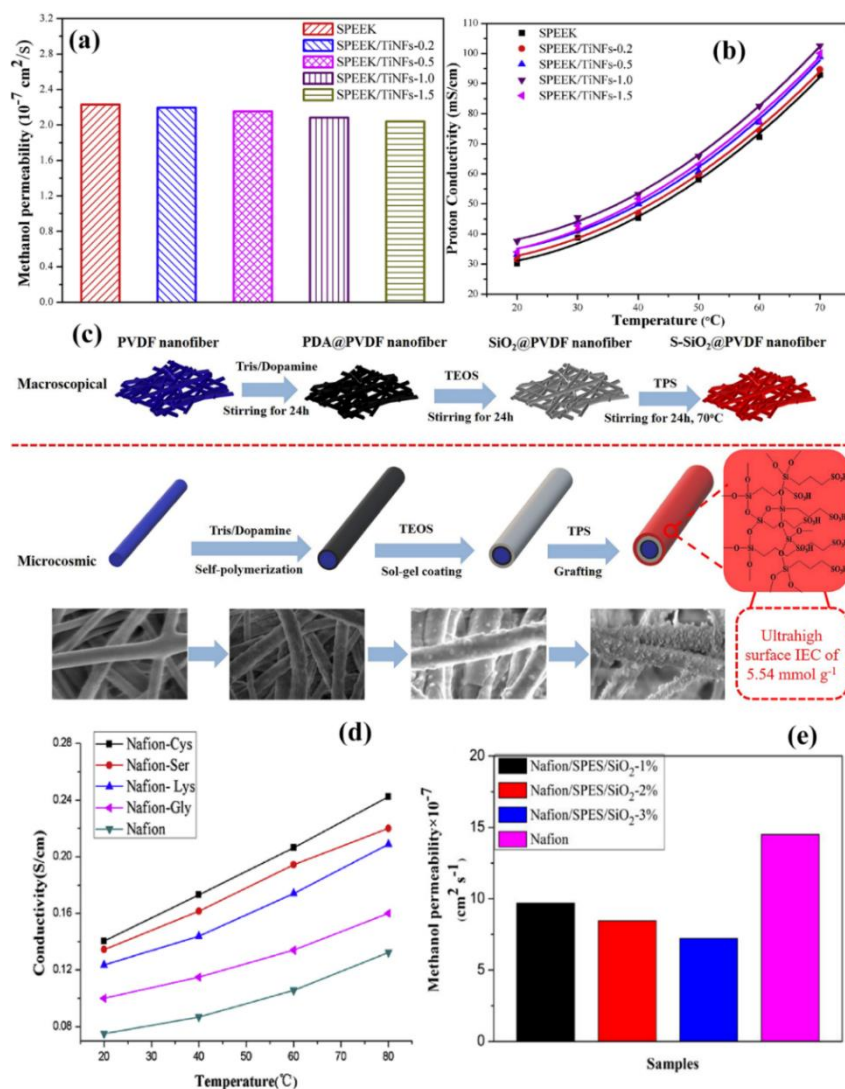

**Fig. S 11** (a) Methanol permeability and (b) Proton Conductivity values of pristine SPEEK and SPEEK with different contents of Titania nanofiber (c) Schematic explanation of synthesis procedure of sulfonated silica coated PVDF nanofibers (d) Temperature Vs Proton conductivity values of Nafion with Cys, Ser, Lys and Gly along with pristine Nafion membranes (e) Methanol permeability values of Nafion/SPES composite membrane incorporated with 1-3 wt.%  $\text{SiO}_2$  <sup>19 2021,22</sup>. With copyright permission 2017 and 2020, Elsevier.

## Abbreviations

PEM: Proton exchange membrane  
 GO: Graphene Oxide  
 SGO: Sulfonated Graphene Oxide  
 PEG: Polyethylene glycol  
 F-silica: Functionalized silica  
 ZrP: Zirconium phosphate  
 UiO-66 : Zirconium based metal organic framework  
 UiO-66-NH<sub>2</sub>: Zirconium based metal organic framework-Ammonia  
 GO@UiO-66: Graphene oxide coated zirconium based metal organic framework  
 MILs- MOFs: Materials of the institute Lavoisier metal organic frameworks  
 MOFs: Metal organic frameworks

Electronic Supplementary Material (ESI) for Energy Advances. This journal is © The Royal Society of Chemistry  
2024

ZrSPP: zirconium sulfophenyl  
PDHC: 1, 4-phenyldiamine hydrochloride  
Co<sub>3</sub>O<sub>4</sub>: Cobalt Oxide  
ZIF: Zeolitic imidazolate framework  
S(ZIF-C): Sulfonated zeolitic imidazolate framework-derived porous carbon  
SiO<sub>2</sub>: Silicon dioxide  
SSiO<sub>2</sub>: Sulfonated silicon dioxide  
Zr-Cr-SO<sub>3</sub>H: Zirconium-chromium sulfonic groups  
SiO<sub>2</sub>@GO: Graphene oxide coated silicon dioxide  
TiO<sub>2</sub>: Titanium dioxide  
GO: Graphene oxide  
SiO<sub>2</sub>-Al<sub>2</sub>O<sub>3</sub>: Silicon dioxide-aluminum Oxide  
Al<sub>2</sub>O<sub>3</sub>: Aluminum Oxide  
TiSiO<sub>4</sub>: Titanium silicate  
MOS<sub>2</sub>: Molybdenum sulfide  
E-MOS<sub>2</sub>: Exfoliated molybdenum sulfide  
MOS<sub>2</sub>@CNT: Carbon nanotube coated molybdenum sulfide  
Pd-GO: Palladium -graphene oxide  
F-GO: Functionalized graphene Oxide  
rGO: Reduced graphene oxide  
MPTES: 3-mercaptopropyl triethoxysilane  
GMPTS: Gamma-glycidoxypropyltrimethoxysilane  
MPTES: 3- mercaptopropyl triethoxysilane  
S-MMT: Sulfonated montmorillonite  
BTA: Benzotriazole  
SHNT: Sulfonated halloysite nanotubes  
HDTA: Hexadecyltrimethylammonium chloride  
PTFE: Polytetrafluoroethylene  
PVDF: Polyvinylidene Fluoride  
LBL: Layer by layer  
SPAEK: Sulfonated poly(arylene ether ketone)  
SSiO<sub>2</sub>: Sulfonated silica  
SBN: Sulfonated boron nitride  
BN: Boron nitride  
GMPT: Gamma-glycidoxypropyl trimethoxysilane  
TAP: 2,4,6-triaminopyrimidine  
TPS: 3-trihydroxysilyl-1-propanesulfonic  
TTIP: Titanium tetraisopropoxide  
SiWA: Tungstosilicic acids  
QA: Quaternary ammonium  
SBMA: Sulfobetaine methacrylate  
SPPEK: Sulfonated poly(phthalazinone ether sulfone ketone)  
ZrSPP: Zirconium sulfophenyl  
SEM: Scanning electron microscopy  
SPEEK: Sulfonated poly (ether ether ketone)  
TEOS: Tetraethyl orthosilicate  
H<sub>2</sub>SO<sub>4</sub>: Sulfuric acid  
ITO: Indium Tin Oxide  
PVDF-HFP: Poly(vinylidene difluoride-co-hexafluoropropylene)  
QPEI: Quaternized polyethyleneimine  
PVA: Polyvinyl alcohol  
SA: Sodium alginate  
PWA: Phosphotungstic acid  
ZrP: Zirconium Phosphate  
Tin (IV) oxide: SnO<sub>2</sub>  
Ph-CA: phosphorous-functionalized cellulose acetate  
DNA: Deoxyribonucleic Acid  
PVDF-PS: Polyvinylidene fluoride grafted polystyrene  
S(ZIC-C): sulfonated zeolitic imidazolate framework-derived porous carbon

## References

- 1 A. Pagidi, G. Arthanareeswaran and M. M. Seepana, *Int. J. Hydrogen Energy*, 2020, **45**, 7829–7837.
- 2 F. Dong, Z. Li, S. Wang, L. Xu and X. Yu, *Int. J. Hydrogen Energy*, 2011, **36**, 3681–3687.
- 3 D. Cozzi, C. de Bonis, A. D’Epifanio, B. Mecheri, A. C. Tavares and S. Licocchia, *J. Power Sources*, 2014, **248**, 1127–1132.
- 4 K. Divya, M. S. Sri Abirami Saraswathi, A. Nagendran and D. Rana, *J. Appl. Polym. Sci.*, 2022, **139**, 1–15.
- 5 N. Niluroutu, K. Pichaimuthu, S. Sarmah, P. Dhanasekaran, A. Shukla, S. M. Unni and S. D. Bhat, *New J. Chem.*, 2018, **42**, 16758–16765.
- 6 F. Zhong, Z. Zeng, Y. Liu, R. Hou, X. Nie, Y. Jia, J. Xi, H. Liu, W. Niu and F. Zhang, *Polymer (Guildf.)*, 2022, **249**, 124839.
- 7 Y. A. Sihombing, Susilawati, S. U. Rahayu and M. D. Situmeang, *Mater. Sci. Energy Technol.*, 2023, **6**, 252–259.
- 8 P. Prapainainar, A. Theampetch, P. Kongkachuichay, N. Laosiripojana, S. M. Holmes and C. Prapainainar, *Surf. Coatings Technol.*, 2015, **271**, 63–73.
- 9 P. Prapainainar, Z. Du, A. Theampetch, C. Prapainainar, P. Kongkachuichay and S. M. Holmes, *Energy*, 2020, **190**, 116451.
- 10 S. Al-Batty, C. Dawson, S. P. Shanmukham, E. P. L. Roberts and S. M. Holmes, *J. Mater. Chem. A*, 2016, **4**, 10850–10857.
- 11 F. Altaf, S. Ahmed, D. Dastan, R. Batool, Z. U. Rehman, Z. Shi, M. U. Hameed, P. Bocchetta and K. Jacob, *Mater. Today Chem.*, 2022, **24**, 100843.
- 12 M. M. Hasani-Sadrabadi, S. H. Emami and H. Moaddel, *J. Power Sources*, 2008, **183**, 551–556.
- 13 M. M. Hasani-Sadrabadi, S. R. Ghaffarian and P. Renaud, *RSC Adv.*, 2013, **3**, 19357.
- 14 H. Bai, H. Zhang, Y. He, J. Liu, B. Zhang and J. Wang, *J. Memb. Sci.*, 2014, **454**, 220–232.
- 15 S. Zhao, Y. Yang, F. Zhong, W. Niu, Y. Liu, G. Zheng, H. Liu, J. Wang and Z. Xiao, *Polymer (Guildf.)*, 2021, **226**, 123800.
- 16 V. Kumar, S. A. GokulaKrishnan, G. Arthanareeswaran, A. F. Ismail, J. Jaafar, D. B. Das and L. T. Yogarathinam, *Polym. Bull.*, DOI:10.1007/s00289-022-04637-w.
- 17 S. Sasikala, S. Meenakshi, S. D. Bhat and A. K. Sahu, *Electrochim. Acta*, 2014, **135**, 232–241.
- 18 S. Sasikala, G. Rambabu, A. Shukla, N. Nagaraju and S. D. Bhat, *J. Electrochem. Soc.*, 2018, **165**, F1358–F1368.
- 19 C. Dong, Z. Hao, Q. Wang, B. Zhu, C. Cong, X. Meng and Q. Zhou, *Int. J. Hydrogen Energy*, 2017, **42**, 25388–25400.
- 20 G. Liu, W.-C. Tsen and S. Wen, *Mater. Des.*, 2020, **193**, 108806.
- 21 H. Wang, X. Li, X. Zhuang, B. Cheng, W. Wang, W. Kang, L. Shi and H. Li, *J. Power Sources*, 2017, **340**, 201–209.
- 22 H. Wang, X. Wang, T. Fan, R. Zhou, J. Li, Y. Long, X. Zhuang and B. Cheng, *Solid State Ionics*, 2020, **349**, 115300.
