# Supplementary figures and images for: A review of proton exchange membranes modified with inorganic nanomaterials for fuel cells
Source: Royal Society of Chemistry journal article supplement (doi:10.1039/d4ya00446a), 2024-12-09

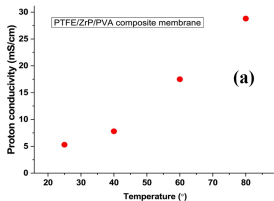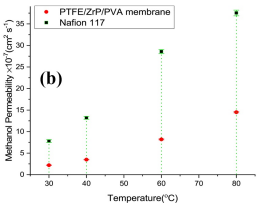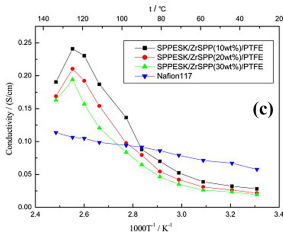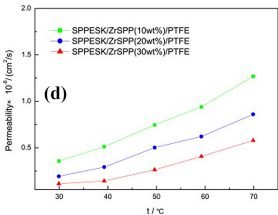

Supplement: d4ya00446a1.pdf [file d4ya00446a1.pdf]

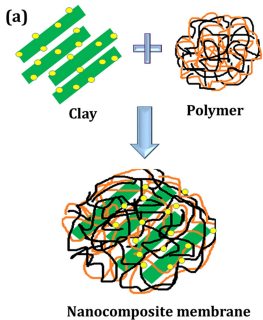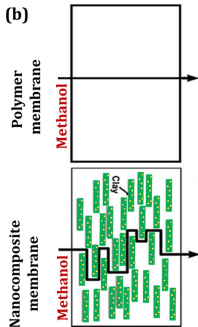

Supplement: d4ya00446a10.pdf [file d4ya00446a10.pdf]

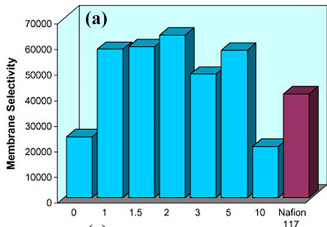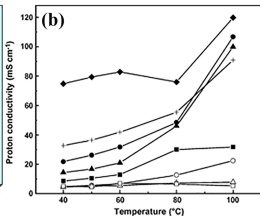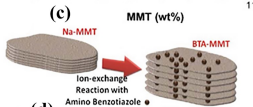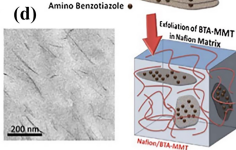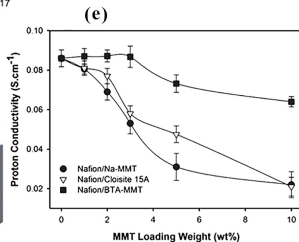

Supplement: d4ya00446a11.pdf [file d4ya00446a11.pdf]

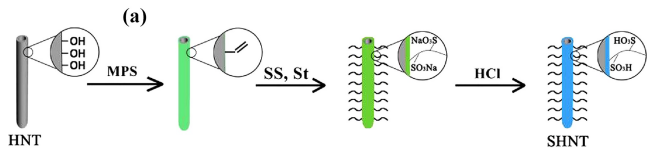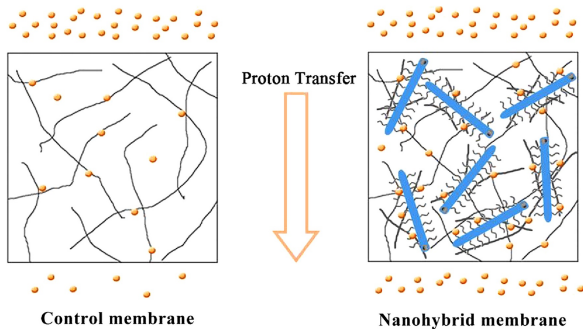

● Proton

— CS chain

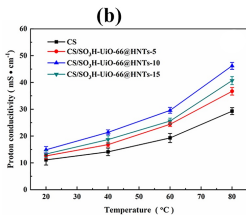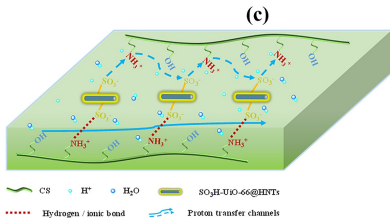

Supplement: d4ya00446a12.pdf [file d4ya00446a12.pdf]

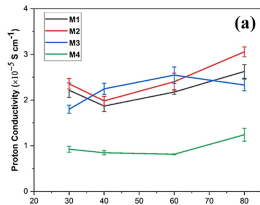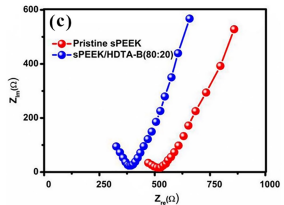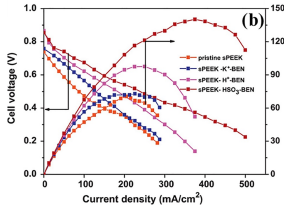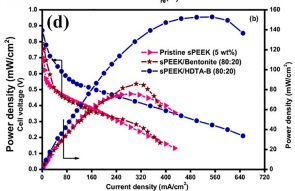

Supplement: d4ya00446a2.pdf [file d4ya00446a2.pdf]

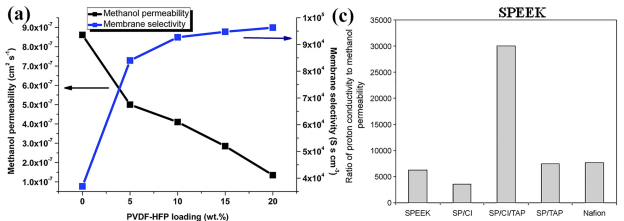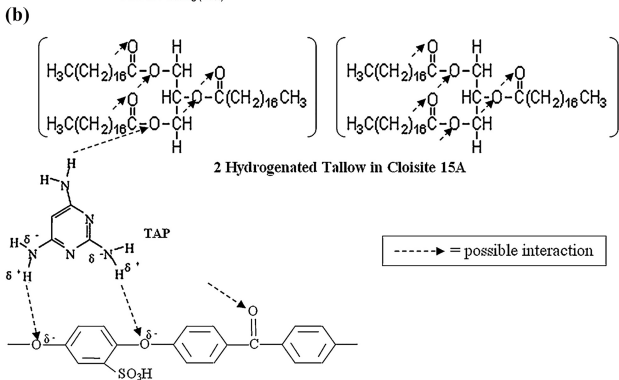

Supplement: d4ya00446a3.pdf [file d4ya00446a3.pdf]

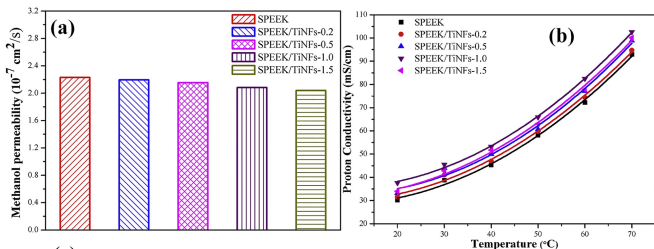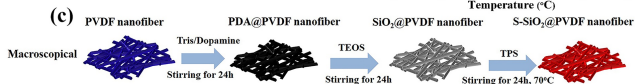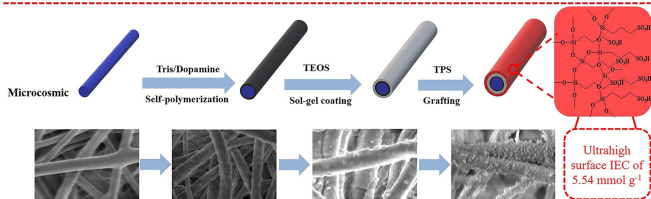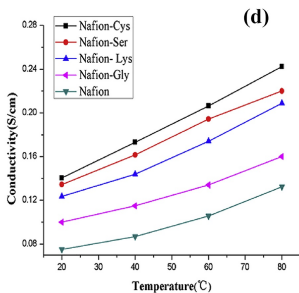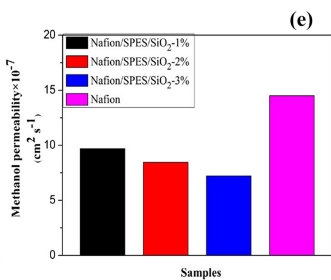

Supplement: d4ya00446a4.pdf [file d4ya00446a4.pdf]

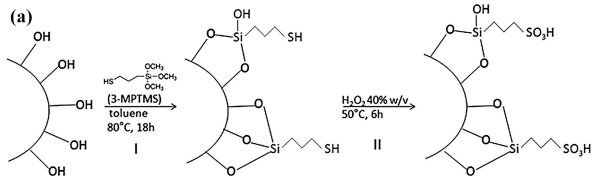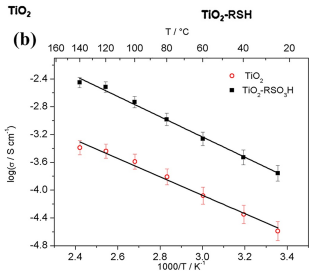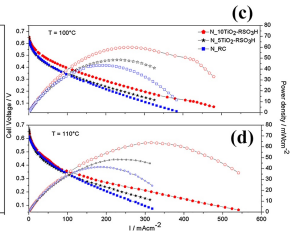

Supplement: d4ya00446a5.pdf [file d4ya00446a5.pdf]

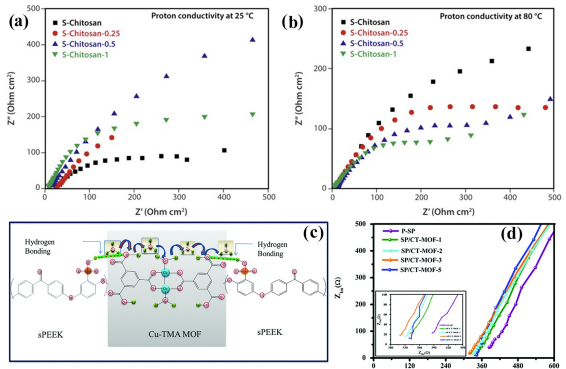

Supplement: d4ya00446a6.pdf [file d4ya00446a6.pdf]

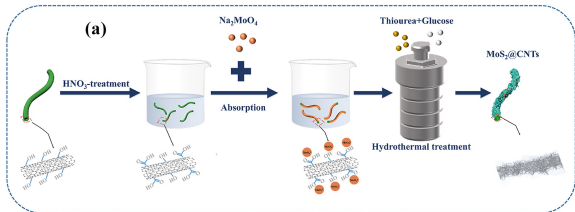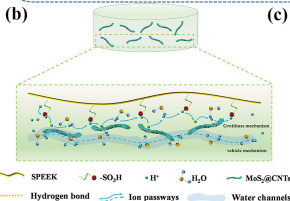

Supplement: d4ya00446a7.pdf [file d4ya00446a7.pdf]

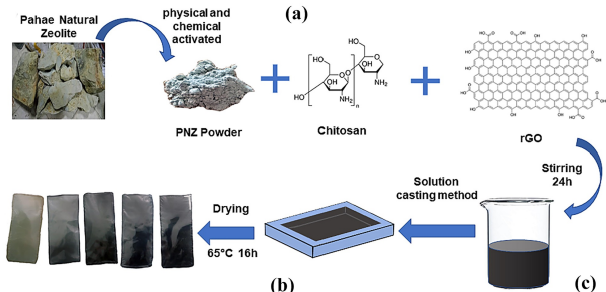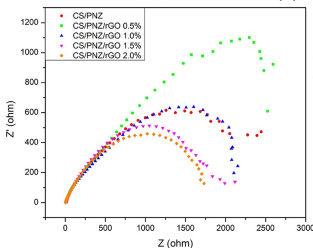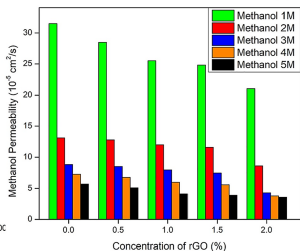

Supplement: d4ya00446a8.pdf [file d4ya00446a8.pdf]

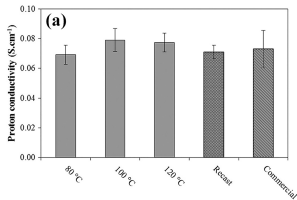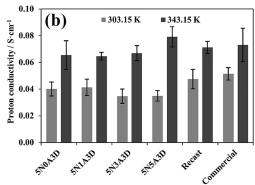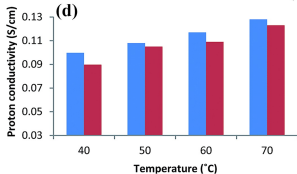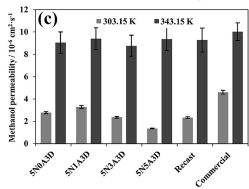

Supplement: d4ya00446a9.pdf [file d4ya00446a9.pdf]
